# Supplementary material for: Gene Expression Profiling of Dendritic Cells Reveals Important Mechanisms Associated with Predisposition to Staphylococcus Infections
Source: PLoS One. 2011 Aug 12;6(8):e22147. doi: 10.1371/journal.pone.0022147 (PMC3155527; doi:10.1371/journal.pone.0022147)
Supplement: Table S1 — List of the differentially expressed genes in the time course identified by ANOVA of microarray data (FC>2, BH1%, n = 419) at 0, 3 and 8 hrs. (XLS) [file pone.0022147.s001.xls]

## Sheet: DC_Infection_BH1_FC2
ProbeName	GenbankAccession	HGNC_Approved	FC T3/T0	FC T8/T0	FC T8/T3
A_70_P030307	NM_001009461	AA-NAT	2.65607	1.37386	-1.9333
A_70_P069796	EE851901	ABCA1	1.50054	3.10457	2.06897
A_70_P030656	DY511352	ACAP3	2.12229	-1.00085	-2.12409
A_70_P046546	EE777046	ACTN3	2.28807	1.07402	-2.13038
A_70_P013771	EE831337	ACVRL1	2.03885	3.08618	1.51369
A_70_P051471	FE030274	ADAM19	-1.54585	-2.29347	-1.48363
A_70_P010466	FE036147	ADCY6	1.87997	4.15355	2.20937
A_70_P015291	FE028925	ADM	6.19333	5.29523	-1.1696
A_70_P051241	NM_001009775	ADORA3	-2.63641	-1.59998	1.64778
A_70_P059426	EE760444	AFF4	2.12744	1.18323	-1.79799
A_70_P030911	EE824712	ALAS1	1.1361	2.12932	1.87424
A_70_P000006	EE752115	ALCAM	-1.24202	2.16385	2.68756
A_70_P055911	EE828613	ALOX5	-1.71225	-2.19469	-1.28176
A_70_P054661	EE771403	AMBP	2.10237	1.1079	-1.89761
A_70_P002981	CF116273	ANGPT4	2.27574	1.09307	-2.08196
A_70_P009381	DY508009	ANO8	1.63169	-1.31542	-2.14635
A_70_P043671	EE756000	APCDD1	1.77764	-1.16123	-2.06424
A_70_P050827	DY511157	APOA1	2.27218	1.93059	-1.17693
A_70_P025251	EE800954	ARHGAP4	-1.30533	-2.01784	-1.54584
A_70_P013521	EE872563	ARHGDIB	-1.8101	-2.91224	-1.60889
A_70_P011991	FE031728	ARL13B	2.20343	1.12139	-1.9649
A_70_P025286	FE021846	ARL5B	2.4696	1.86813	-1.32196
A_70_P071811	FE034806	ARV1	2.16991	3.15575	1.45432
A_70_P071436	EE756331	ATF3	2.09229	4.47407	2.13836
A_70_P007861	EE820943	ATP2A3	-1.03649	-2.12012	-2.04549
A_70_P014116	FE037764	ATP6V0E2	2.02578	1.15066	-1.76054
A_70_P046081	EE827715	B4GALNT1	-1.504	-3.21022	-2.13445
A_70_P035131	EE802696	BATF3	1.35385	2.58095	1.90638
A_70_P064366	EE800986	BCL11A	-1.91639	-2.57835	-1.34542
A_70_P065446	EE798739	BCL2A1	1.82873	2.03948	1.11524
A_70_P007991	EE807403	BCL2L11	1.50711	2.13242	1.4149
A_70_P055381	DY492105	BIRC3	1.20013	2.37254	1.97691
A_70_P033486	EE827640	BLNK	-2.57295	-1.96672	1.30824
A_70_P054721	EE765190	C15orf39	-1.35361	-2.04821	-1.51314
A_70_P066706	EE780984	C15orf41	1.03199	-1.94436	-2.00655
A_70_P024701	EE793142	C16orf75	-1.97056	-2.47224	-1.25458
A_70_P055111	FE025411	C19H17orf61	2.46683	1.10106	-2.24041
A_70_P064901	EE748017	C19orf33	2.11249	1.36089	-1.55228
A_70_P030056	NM_001009327	C1orf116	2.15678	2.81451	1.30496
A_70_P052871	EE791504	C1orf63	1.56201	2.4527	1.57023
A_70_P036436	EE824663	C20orf29	-2.09696	-1.04695	2.00293
A_70_P028076	EE819685	C22orf13	2.01625	1.20784	-1.6693
A_70_P004256	EE757496	C5H12orf11	-1.84957	1.19831	2.21636
A_70_P035781	EE866828	C5H12ORF57	1.54446	2.03944	1.32048
A_70_P059846	EE749140	C5orf13	2.64736	1.39297	-1.90052
A_70_P041261	DY508669	CASP3	-1.48438	2.15531	3.19931
A_70_P016516	DY493176	CAV1	3.27169	3.90836	1.1946
A_70_P038971	FE037635	CCDC109A	2.7341	1.49846	-1.8246
A_70_P008916	EE811189	CCL22	1.938	2.85089	1.47105
A_70_P030212	NM_001040287	CCR10	2.30948	1.56638	-1.47441
A_70_P051117	NM_001009241	CCR3	-2.22879	-3.58042	-1.60644
A_70_P064676	EE826294	CCR7	1.26438	3.16879	2.5062
A_70_P016356	EE827521	CD163L1	2.71715	1.23107	-2.20714
A_70_P039001	EE783598	CD200	1.83398	3.53243	1.9261
A_70_P010406	DY505480	CD248	2.2295	-1.01021	-2.25227
A_70_P026642	EE821767	CD40	1.19191	2.86786	2.40611
A_70_P059796	EE833237	CD59	-1.09606	1.85866	2.0372
A_70_P052226	EE826343	CD83	2.32231	2.7182	1.17047
A_70_P010496	FE021943	CDC42EP1	1.69948	-1.29788	-2.20573
A_70_P010806	EE764150	CDCA7	-2.04441	-1.81698	1.12517
A_70_P016256	EE753172	CDH1	-1.64536	-4.91501	-2.98719
A_70_P004976	NM_001142510	CDKN1C	-1.35122	-2.62948	-1.94601
A_70_P051571	EE815472	CDT1	-1.63093	-2.30976	-1.41622
A_70_P037926	EE791862	CES2	2.49103	1.41359	-1.7622
A_70_P016316	EE779059	C-FOS	-7.01542	-9.47616	-1.35076
A_70_P003056	NM_001098882.1	CHAC1	2.00482	1.40669	-1.4252
A_70_P029091	EE822730	CHST15	-1.29496	1.69506	2.19503
A_70_P043696	FE033362	CHST3	1.92998	2.67409	1.38555
A_70_P033731	EE859757	CKB	-1.54543	-3.43276	-2.22123
A_70_P009106	EE831464	CLASP1	2.35708	1.8907	-1.24667
A_70_P024382	EU048231	CLCN2	1.64498	-1.25886	-2.0708
A_70_P068031	EE752786	CLDN1	1.32256	2.21473	1.67457
A_70_P023216	EE864116	CNNM2	-2.50859	-2.03905	1.23027
A_70_P056861	EE807616	CNR2	1.64149	2.0557	1.25234
A_70_P024506	DY509802	COL1A1	2.17765	1.2151	-1.79216
A_70_P030541	EE792473	COPB2	-1.88079	1.26165	2.37289
A_70_P018436	DY495812	CRABP2	4.14914	4.55235	1.09718
A_70_P047061	EE803206	CREB3L2	-1.682	1.47323	2.47797
A_70_P012576	NM_001104935	CREM	2.9455	3.13794	1.06533
A_70_P012577	NM_001104935	CREM	2.42464	3.02206	1.24639
A_70_P013671	EE781311	CRTC2	2.25068	1.15935	-1.94133
A_70_P067771	EE831373	CSF1	5.81943	5.6561	-1.02888
A_70_P016862	L07939	CSF3	3.8304	10.3425	2.70012
A_70_P039417	NM_001009373	CSN2	2.00461	1.29967	-1.5424
A_70_P030476	EE757904	CTGF	4.33873	3.04366	-1.4255
A_70_P029997	NM_001009214	CTLA4	1.61682	2.44264	1.51077
A_70_P039366	NM_001009191	CXCL10	-1.14041	2.01575	2.29877
A_70_P057176	EE822217	CXCL16	1.4046	2.06183	1.46791
A_70_P063926	FE021518	CXCR5	1.95589	-1.03983	-2.0338
A_70_P030432	NM_001093790	CYB561	2.73359	1.52254	-1.79541
A_70_P024321	EF635857	CYP24A1	1.47202	2.25977	1.53515
A_70_P042836	EE863958	CYP26B1	3.04661	2.00464	-1.51978
A_70_P036181	DQ239628	CYR61	6.9879	5.79936	-1.20494
A_70_P059746	DY511533	CYR61	9.12063	9.72748	1.06654
A_70_P007696	EE812371	CYTH1	-1.24288	1.68855	2.09866
A_70_P069651	EE855296	DAB2	-1.43127	-2.09157	-1.46133
A_70_P033751	CU638521	DCTN4	2.10513	1.04243	-2.01945
A_70_P017561	DY513724	DHRS3	-1.68588	-2.5322	-1.50201
A_70_P031886	EE757136	DKK3	2.22567	2.92034	1.31212
A_70_P059611	DY504356	DLL4	3.21527	8.25719	2.56812
A_70_P017836	DY481477	DMP1	2.02737	-1.05326	-2.13534
A_70_P003081	EE784689	DPYSL2	-1.88211	1.21596	2.28857
A_70_P007326	FE029044	DTX1	2.08126	1.02605	-2.02842
A_70_P048891	EE751707	DUSP5	2.00054	1.59546	-1.2539
A_70_P057696	EE827357	DUSP7	-2.05629	-1.8627	1.10393
A_70_P028411	EE799346	DYRK1B	2.03205	1.26651	-1.60445
A_70_P051286	NM_001009810	EDN1	3.95317	9.69795	2.4532
A_70_P041852	AF349439	EDNRB	-2.03706	-2.99583	-1.47067
A_70_P059661	DQ239634	EGR1	-1.24537	-2.02245	-1.62398
A_70_P040546	EE855742	EGR3	6.41529	2.46568	-2.60184
A_70_P061666	EE749143	EHHADH	-1.46898	-2.05886	-1.40156
A_70_P055771	EE772134	EIF2B1	-2.30131	-1.15682	1.98934
A_70_P017236	EE793763	EIF3C	-1.88418	1.36199	2.56622
A_70_P063516	FE036218	ELF3	2.95024	2.82841	-1.04307
A_70_P047166	EE762128	enJRSV8	3.25121	1.17864	-2.75845
A_70_P012176	FE032276	ENPEP	2.01782	1.13953	-1.77074
A_70_P008536	EE769923	EPAS1	1.47754	2.55996	1.73259
A_70_P026021	AY029231	EPOR	2.9829	1.7723	-1.68306
A_70_P006161	EE862234	F3	13.0233	8.76478	-1.48586
A_70_P040046	EE762795	FADS1	1.6507	-1.4007	-2.31213
A_70_P000746	FE026437	FAM102B	-1.62974	-2.62591	-1.61125
A_70_P043771	FE028512	FAM23B	-1.0545	-2.78533	-2.64138
A_70_P024101	EE856626	FAM36A	1.77224	2.49225	1.40627
A_70_P038771	EE782257	FAM46A	-1.93642	-2.00503	-1.03543
A_70_P064446	EE807388	FAM78A	-1.29014	-2.00468	-1.55385
A_70_P041481	NM_001123003	FAS	1.22826	2.46123	2.00383
A_70_P041482	NM_001123003	FAS	1.1216	2.30685	2.05675
A_70_P010896	EE863640	FCGBP	2.05236	1.26076	-1.62787
A_70_P010331	EE790769	FERMT2	1.81376	2.75444	1.51863
A_70_P068081	DQ152951	FGF1	1.42279	3.45639	2.42931
A_70_P067996	DQ336700	FGF18	6.78242	6.50174	-1.04317
A_70_P059526	DY492069	FKBP10	2.0756	1.21128	-1.71356
A_70_P013136	EE800274	FLNB	2.08626	2.45019	1.17444
A_70_P026602	AF513910	FLT1	2.57638	3.30798	1.28397
A_70_P000606	EE830716	FNIP2	1.6244	2.39351	1.47347
A_70_P026731	CN823289	FOS	-4.8686	-10.0076	-2.05554
A_70_P020771	DY492403	FSCN1	1.71714	2.62336	1.52775
A_70_P009501	DY491466	GADD45B	3.20015	5.11675	1.59891
A_70_P001461	EF192584	GALR3	2.13891	1.15646	-1.84953
A_70_P063336	EE783131	GEM	4.40226	4.5799	1.04035
A_70_P001526	CN824066	GFAP	2.07008	1.16468	-1.77739
A_70_P007211	FE024840	GFPT1	-1.27613	1.58668	2.0248
A_70_P070041	EE829336	GIMAP5	-1.47443	1.4915	2.19911
A_70_P031266	EE793954	GJA4	1.8456	-1.22211	-2.25552
A_70_P030086	NM_001009780	GJB2	-1.54643	2.39475	3.70331
A_70_P039321	NM_001009805	GMCSF	8.12591	15.0399	1.85086
A_70_P062746	EE873566	GMNN	-1.4328	-2.1576	-1.50585
A_70_P048311	CU652362	GNA13	2.09166	1.20068	-1.74206
A_70_P027526	DY509832	GPC1	2.19561	1.06259	-2.06628
A_70_P024626	EE775351	GPD2	-1.16007	1.90701	2.21225
A_70_P034036	CO202382	GPR158	2.04883	1.34753	-1.52043
A_70_P061866	EE749715	GPR56	2.4281	1.55459	-1.56189
A_70_P002751	AY346124	GRIA3	2.01582	1.12297	-1.79508
A_70_P016657	EE835635	GSTA1	2.22413	-1.09647	-2.43869
A_70_P057346	EE747199	GUCY1B3	3.12273	2.20118	-1.41866
A_70_P027591	DY491786	H1FX	-1.10303	-2.32261	-2.10567
A_70_P009961	EE760438	HAUS5	3.34241	1.78341	-1.87417
A_70_P061456	EE804050	HMGA1	2.26165	1.28875	-1.75492
A_70_P000311	EE758932	HMGCR	2.02978	1.29142	-1.57174
A_70_P016071	EE827449	HMOX1	-2.17999	1.13048	2.46444
A_70_P026252	AJ311788	HNF1B	2.13099	1.52706	-1.39548
A_70_P040281	EE791739	HPX	2.12682	1.25617	-1.6931
A_70_P062066	EE864468	HR	2.23237	1.89097	-1.18054
A_70_P041502	AJ131185	HRH2	2.05271	1.02433	-2.00396
A_70_P051221	NM_001009395	HSD11B1	-1.79016	1.35005	2.4168
A_70_P030456	EE823607	HSD3B7	-1.03067	2.05745	2.12055
A_70_P031192	EE825964	HSP70.1	1.29525	2.46972	1.90675
A_70_P060956	EE858199	HSPA1A	1.23559	2.58313	2.0906
A_70_P003981	FE028387	HSPA6	1.4035	2.43403	1.73426
A_70_P027661	EE828081	HSPB8	1.64487	2.43578	1.48084
A_70_P071266	EE814810	HSPH1	-1.33168	1.63736	2.18043
A_70_P030136	NM_001009731	ICAM1	2.18115	2.6397	1.21023
A_70_P025771	FE023193	IDO1	1.4681	2.37939	1.62073
A_70_P006501	EE782051	IFI44	-2.09208	-2.10242	-1.00494
A_70_P020936	EE749604	IFRD1	1.29551	2.49757	1.92786
A_70_P031246	AY734682	IGL	2.76786	1.33212	-2.07778
A_70_P030057	NM_001009327	IL10	2.66847	3.0153	1.12998
A_70_P023971	EE831252	IL10RA	2.90715	1.92535	-1.50993
A_70_P039626	NM_001009438	IL12B	1.3972	4.54021	3.24951
A_70_P045736	EE793564	IL12RB1	2.59624	2.50832	-1.03505
A_70_P030112	NM_001009734	IL15	1.15107	3.26988	2.84072
A_70_P041521	DY520514	IL15	1.39694	2.8931	2.07103
A_70_P030162	NM_001009415	IL2RA	1.63623	2.54212	1.55364
A_70_P055436	EE792897	IL4I1	1.47131	2.66745	1.81297
A_70_P039706	NM_001009392	IL6	3.37523	2.91428	-1.15817
A_70_P047481	EE804300	INF2	2.03517	1.06085	-1.91844
A_70_P022486	EE819467	INPP5B	-1.16504	1.84271	2.14684
A_70_P043501	EE769056	INSIG1	1.58053	2.23808	1.41603
A_70_P066956	EE828991	IRAK2	2.66643	3.87075	1.45166
A_70_P050981	NM_001009751	IRF1	1.27138	2.68367	2.11083
A_70_P045796	EE794218	IRF4	2.03027	2.43656	1.20011
A_70_P056296	EE839187	ITGB4	1.87669	-1.0795	-2.02589
A_70_P068127	DQ152971	JAG1	2.19051	4.97077	2.26923
A_70_P048401	EE750630	JUN	2.31426	1.67263	-1.3836
A_70_P005166	EE842250	KANK2	2.21239	-1.03687	-2.29397
A_70_P035441	FE035106	KIAA0748	-1.54682	-2.27586	-1.47131
A_70_P067721	EE831246	KLF13	-2.03963	-1.34726	1.51391
A_70_P023021	FE024086	KLF4	2.5334	1.67322	-1.51409
A_70_P002991	EE838448	KRTAP2-4	2.1392	-1.06175	-2.27129
A_70_P010526	EE754878	LANCL1	1.62736	-1.46916	-2.39085
A_70_P054646	EE822881	LAT	1.59193	2.32055	1.4577
A_70_P034916	FE028654	LHFP	2.23347	1.16125	-1.92334
A_70_P014996	FE036125	LIMS1	1.78636	2.19982	1.23146
A_70_P037226	EE804136	LIN37	2.02922	1.15227	-1.76106
A_70_P027926	DY499454	LMF2	1.92973	-1.22852	-2.37071
A_70_P006216	EE780285	LMO7	1.33102	2.1188	1.59186
A_70_P052471	EE830744	LOC100270756	1.34064	2.49365	1.86005
A_70_P043531	EE859152	LOC513210	2.36063	1.24015	-1.9035
A_70_P045831	EE826978	LOC533883	1.43567	2.50315	1.74354
A_70_P064766	EE861131	LOC698063	-2.57405	-2.77939	-1.07977
A_70_P002561	EE752139	LOC743659	1.83259	2.64345	1.44247
A_70_P025726	FE025048	LOH11CR1G	2.86656	-1.06253	-3.0458
A_70_P039016	EE833955	LPAR6	-2.01056	-2.72009	-1.3529
A_70_P057536	EE777623	LPHN2	2.4747	2.50947	1.01405
A_70_P071771	FE034476	LY6G6F	2.48868	1.50178	-1.65715
A_70_P051226	NM_001097647	LYZ	-2.20589	-2.1486	1.02666
A_70_P022696	EE853321	M arch3	1.63572	3.42154	2.09176
A_70_P065596	EE753915	MAF	-1.47539	-2.96554	-2.01
A_70_P008991	EE811885	MAGEF1	-2.57833	-1.54068	1.67349
A_70_P042831	EE825080	MAP2K6	-1.15441	-3.524	-3.05265
A_70_P017471	DY494430	MAP3K6	-1.59449	-2.00832	-1.25954
A_70_P045701	EE826709	MAP4K1	1.23497	-2.0283	-2.50488
A_70_P004426	EE795736	MAPRE1	2.03757	1.38542	-1.47073
A_70_P061401	EE824841	MARCKSL1	1.51052	2.29342	1.5183
A_70_P040411	EE831344	MAST3	-1.35624	-2.00235	-1.4764
A_70_P041562	DY498904	MDFI	2.247	1.13876	-1.9732
A_70_P028476	EE825995	MESDC1	2.18041	1.31414	-1.65918
A_70_P065386	EE753492	METTL7A	-1.08744	-2.03819	-1.87429
A_70_P038686	EE830691	MFNG	-1.18477	-2.52171	-2.12844
A_70_P006751	CD288377	MFSD2A	1.49641	2.00918	1.34266
A_70_P028006	DY498901	MFSD7	1.56456	-1.43286	-2.2418
A_70_P061551	EE748305	MLLT1	5.179	1.01471	-5.10394
A_70_P061381	DY493204	MRC2	2.03121	1.1392	-1.78301
A_70_P056511	EE873252	MSH2	-2.15869	-1.53071	1.41025
A_70_P037411	EE798177	MT1	-3.57216	-2.98176	1.198
A_70_P036376	EE827010	MVD	1.6417	2.28291	1.39057
A_70_P039716	NM_001078652	MX2	-2.69954	-2.0436	1.32097
A_70_P072266	DY504615	MXRA8	-1.35304	-2.44211	-1.80491
A_70_P054821	EE765667	MYBL2	2.02592	1.19511	-1.69518
A_70_P018706	EE780619	MYL9	2.50908	3.07878	1.22705
A_70_P030681	DY498267	MYL9	3.0789	3.05163	-1.00894
A_70_P069001	NM_001145183	MYLPF	2.46701	1.57566	-1.56571
A_70_P067516	DY490987	NAB2	2.77556	1.73352	-1.60111
A_70_P042786	EE860702	NAB2	2.15769	1.52607	-1.41388
A_70_P028566	EE828598	NAGPA	3.38334	-1.24613	-4.21607
A_70_P008166	DQ822575	NAMPT	-1.47878	1.50992	2.23284
A_70_P045386	EE854268	NAPRT1	1.11687	-1.82954	-2.04336
A_70_P055126	EE818067	NBEAL2	-1.20207	-2.16853	-1.80399
A_70_P040361	EE818858	NDOR1	2.0725	1.64293	-1.26146
A_70_P067681	EE823634	NDUFS8	2.17569	2.82747	1.29957
A_70_P025291	FE021850	NEIL2	2.24017	-1.00624	-2.25416
A_70_P031471	EE774065	NFAT5	2.32262	2.43821	1.04976
A_70_P065571	EE861392	NFIA	1.63543	-1.53684	-2.51339
A_70_P041751	AF283892	NFKB2	2.00599	2.50818	1.25034
A_70_P034391	EE823635	NFKBIE	1.37299	2.30168	1.6764
A_70_P018791	EE857064	NFKBIZ	2.28308	1.673	-1.36466
A_70_P042426	EE781603	NID2	2.07255	1.26791	-1.63461
A_70_P041326	AF223942	NOS2	1.49869	2.95606	1.97243
A_70_P053071	DY491901	NPC1	1.59479	2.58291	1.61959
A_70_P051317	NM_001009479	NPPC	2.2038	1.34646	-1.63674
A_70_P039276	NM_001009452	NPY	2.16974	1.02139	-2.1243
A_70_P030486	EE802379	NR4A1	5.11212	3.38265	-1.51128
A_70_P068106	DQ152960	NRG1	-1.36655	-2.16954	-1.5876
A_70_P024566	FE037117	NRK	2.1873	1.02475	-2.13447
A_70_P014732	EU366494	NRP2	1.20768	2.61003	2.16119
A_70_P032066	EE758827	NT5E	2.07051	1.28317	-1.6136
A_70_P044776	EE861787	NTN1	1.42228	2.32415	1.63411
A_70_P071806	FE034797	NUDT9	2.06901	2.40343	1.16163
A_70_P045331	EE788744	NUP98	1.38357	-1.53623	-2.12548
A_70_P052396	EE769547	OAS1	-2.10906	-1.44203	1.46256
A_70_P022566	EE828314	OBFC2A	1.38503	2.3336	1.68487
A_70_P016111	EE750137	OGDH	2.6813	1.32542	-2.02298
A_70_P028121	EE819366	OGT	1.22157	2.07401	1.69782
A_70_P031321	EE758790	OLL15	2.02553	1.1526	-1.75736
A_70_P041677	AF266480	OPRM1	2.37176	1.19988	-1.97666
A_70_P032921	EE835983	PAK1	-1.29584	-2.21096	-1.70619
A_70_P056251	EE844204	PALMD	1.99511	-1.12782	-2.25012
A_70_P010066	EE825105	PAOX	-1.59228	-2.07328	-1.30208
A_70_P054291	EE830020	PAPSS2	-1.46965	1.52121	2.23566
A_70_P024801	EE813782	PARVG	1.11027	-1.83028	-2.03211
A_70_P037101	EE773698	PBX1	1.43754	-1.6058	-2.30841
A_70_P013516	DY492640	PCBP4	1.68587	-1.72278	-2.90438
A_70_P052376	EE856414	PDGFA	3.703	2.30462	-1.60677
A_70_P017061	FE032437	PDGFB	1.06815	-1.89317	-2.02219
A_70_P051976	DY503841	PDPN	1.08227	3.05098	2.81904
A_70_P070426	EE752745	PDXP	-1.44588	-2.05406	-1.42062
A_70_P032196	EE779407	PDZD11	2.55344	1.18802	-2.14933
A_70_P070801	FE037683	PDZK1IP1	2.08009	1.09859	-1.89341
A_70_P024367	EU020103	PER3	2.32261	1.37956	-1.68359
A_70_P012991	EE823180	PFN1	2.95379	2.1883	-1.34981
A_70_P046746	EE819170	PHACTR1	1.07238	2.09617	1.95469
A_70_P018591	FE024101	PIGR	2.10503	1.28278	-1.64099
A_70_P063581	EE790964	PIGX	1.29724	-1.57869	-2.04793
A_70_P037096	EE773353	PIK3R1	2.71649	1.4335	-1.895
A_70_P025201	EE747274	PLA2G2A	-1.31285	-2.02174	-1.53996
A_70_P007056	DY478703	PLA2G5	-2.24433	1.44046	3.23287
A_70_P072181	FE038219	PLCB2	-1.1474	-2.07178	-1.80564
A_70_P036176	EE825817	PLK3	1.58003	2.08527	1.31976
A_70_P037156	EE773545	PLXNA1	2.10428	3.3168	1.57622
A_70_P065176	EE823926	POLB	2.41457	2.54546	1.05421
A_70_P063191	EE823389	POLD2	-1.35073	-2.26291	-1.67532
A_70_P059616	DY510473	PPP1R15A	2.40866	2.29625	-1.04896
A_70_P037391	EE774767	PPP1R3C	2.44718	2.81137	1.14882
A_70_P019651	EE794257	PPTC7	-1.58202	1.27157	2.01166
A_70_P030041	NM_001009434	PRLH	2.10929	-1.08655	-2.29184
A_70_P056767	NM_001009481	PRNP	-1.17464	1.72581	2.02721
A_70_P050571	EE823172	PRSS23	2.15321	2.34301	1.08815
A_70_P070606	EE805919	PTDSS2	-1.38254	-2.09301	-1.51389
A_70_P041066	AF035415	PTGER1	2.00758	1.1738	-1.71032
A_70_P041076	AF315359	PTGER3	2.01572	1.04209	-1.9343
A_70_P039346	NM_001009789	PTGFR	1.89297	2.83349	1.49685
A_70_P036006	EE849767	PTGFRN	1.31983	-1.87521	-2.47496
A_70_P039257	NM_001009432	PTGS2	5.14966	4.00632	-1.28539
A_70_P055221	EE848089	PXN	1.59683	-1.26438	-2.019
A_70_P009216	EE822439	RABGEF1	1.26161	2.56524	2.0333
A_70_P016456	EE824745	RAC1	-2.22534	-1.64457	1.35315
A_70_P055876	EE827214	RASGEF1A	2.04221	3.37463	1.65244
A_70_P039266	NM_001038014	REG3A	2.7076	1.01184	-2.6759
A_70_P004021	FE021341	REL	2.42465	2.31489	-1.04741
A_70_P052556	DY512589	RELB	2.28601	1.79694	-1.27217
A_70_P000091	EE779338	RGMB	2.21699	1.66463	-1.33182
A_70_P024781	NM_001127286	RHOH	-1.23724	1.97022	2.43764
A_70_P067641	EE829261	RNF113A	-2.01306	-1.4894	1.35159
A_70_P024336	EF627040	ROBO4	2.08507	1.39593	-1.49367
A_70_P007226	FE030863	RPL13AP22	1.46769	2.16807	1.4772
A_70_P016221	EE812478	RPL23A	-2.21953	-1.59969	1.38747
A_70_P018326	EE762396	RPL26	2.18574	1.32737	-1.64666
A_70_P014971	FE035030	RPS14	2.91571	1.04571	-2.78826
A_70_P026931	EE781876	RPS24	3.24266	3.22626	-1.00508
A_70_P049601	EE754905	RPS24	3.25213	3.74766	1.15237
A_70_P022131	FE029147	RPS27A	1.92342	-1.11969	-2.15363
A_70_P038316	CD288883	RPS27L	2.14504	1.11226	-1.92855
A_70_P012661	CO001027	RPS6	3.36143	1.09227	-3.07748
A_70_P031776	FE037907	RTF1	2.68487	1.42892	-1.87895
A_70_P030131	NM_001104930	RTP4	-2.58778	-1.47195	1.75806
A_70_P018406	EE780335	S ep15	2.66167	-1.06662	-2.83899
A_70_P034226	CN822516	S100B	1.31074	2.33141	1.7787
A_70_P044986	FE023196	SCAPER	2.50485	1.11511	-2.24628
A_70_P067351	DY491565	SCARF2	2.20337	1.56897	-1.40435
A_70_P065401	EE792442	SCFD1	2.03033	1.08212	-1.87626
A_70_P067236	EE864799	SDC4	2.95571	2.70913	-1.09102
A_70_P030776	EE773337	SFRP2	1.65063	2.02857	1.22897
A_70_P013126	CF117445	SFRS5	-4.19362	-1.59614	2.62736
A_70_P000356	EE783635	SGMS2	1.82194	2.49978	1.37204
A_70_P036441	DY496968	SHISA4	2.09364	1.32629	-1.57857
A_70_P059556	EE747806	SIPA1	-1.35982	-2.20465	-1.62128
A_70_P051076	NM_001040288	SLAMF1	1.00867	3.47253	3.44269
A_70_P007871	EE806451	SLC11A2	1.12246	2.36187	2.1042
A_70_P020991	DY493742	SLC29A2	2.28858	1.0512	-2.17711
A_70_P022496	EE822018	SLC31A2	-1.26264	1.60036	2.02068
A_70_P019476	EE827453	SLC37A1	-1.74117	-2.64463	-1.51888
A_70_P000886	FE026967	SLC38A9	-2.31812	-2.62743	-1.13343
A_70_P037081	EE829287	SLC44A2	1.86143	-1.41259	-2.62944
A_70_P024377	EU048233	SLC5A8	1.97126	2.09547	1.06301
A_70_P008776	EE830480	SLCO4A1	1.9993	2.02888	1.0148
A_70_P034696	EE836425	SMARCA2	1.11886	-1.94402	-2.17509
A_70_P029882	DY499080	SNAI1	2.86381	1.7254	-1.65979
A_70_P043461	EE752018	SOAT1	1.39283	2.04903	1.47112
A_70_P017741	DY495238	SOCS3	1.61908	2.3247	1.43581
A_70_P039741	NM_001112818	ST3GAL4	-1.2138	-2.02611	-1.66923
A_70_P045351	EE757418	ST3GAL6	1.46064	2.23443	1.52976
A_70_P005246	EE769828	ST6GAL1	-1.48105	-2.25421	-1.52203
A_70_P009116	EE813890	ST6GALNAC2	-1.29032	-2.71275	-2.10239
A_70_P051911	EE773242	ST6GALNAC6	1.05785	-2.02326	-2.14031
A_70_P017771	EE825756	STARD7	-1.59699	1.32141	2.11028
A_70_P039386	NM_001009402	STAT5A	1.14722	2.09694	1.82785
A_70_P012426	FE033251	STIM2	-2.69152	-2.59297	1.03801
A_70_P030316	NM_001009440	STX1B	2.2628	1.16415	-1.94373
A_70_P000116	EE752170	SULF2	-1.30507	-3.15001	-2.41368
A_70_P028796	EE811003	TAF1C	2.09405	2.63062	1.25624
A_70_P069051	DY507201	TAGLN	5.43815	5.82342	1.07085
A_70_P061776	EE749452	TBC1D10C	1.26279	-1.65326	-2.08772
A_70_P009246	EE821715	TBC1D2B	1.74813	2.12408	1.21506
A_70_P034616	EE772219	TBC1D4	2.07376	2.26727	1.09332
A_70_P034346	EE874441	TBC1D9	-1.16218	2.18615	2.54071
A_70_P017311	EE830905	TBRG1	2.15412	1.38648	-1.55366
A_70_P056821	Z12995	TCRD	2.38948	1.28182	-1.86413
A_70_P046426	EE805509	TEAD3	2.14615	1.22574	-1.7509
A_70_P046086	EE799207	TESK1	2.06274	1.76722	-1.16722
A_70_P031861	EE757003	THBD	1.96113	2.40484	1.22625
A_70_P022286	FE022641	THRAP3	2.04872	1.87256	-1.09407
A_70_P058331	FE035310	TIFA	-1.54584	1.78392	2.75766
A_70_P049646	NM_001135059	TLR7	-1.81055	-2.47785	-1.36857
A_70_P020971	EE757971	TM4SF1	2.84579	7.63179	2.68179
A_70_P057206	EE811290	TMEM123	-1.29665	1.55541	2.01682
A_70_P007546	EE827198	TMEM140	1.52956	2.08189	1.3611
A_70_P070021	FE029874	TMEM143	2.21098	-1.27196	-2.81229
A_70_P051671	EE823471	TMEM173	-1.55025	-2.61397	-1.68616
A_70_P010516	EE864510	TMEM181	2.02234	-1.13233	-2.28995
A_70_P009536	EE850825	TMEM219	-1.23253	-2.51874	-2.04356
A_70_P029221	EE849542	TMEM49	2.39429	3.22593	1.34734
A_70_P004661	EE756128	TMEM87A	-1.22179	1.68445	2.05805
A_70_P030271	NM_001024860	TNF	2.61446	2.35894	-1.10832
A_70_P052421	EE810222	TNFAIP3	2.04205	2.43924	1.19451
A_70_P007606	EE814846	TNFRSF18	4.31102	7.98903	1.85316
A_70_P001457	EF121765	TNFSF11	2.79365	1.80731	-1.54575
A_70_P030861	EE825485	TNIP1	2.00084	1.76705	-1.13231
A_70_P051461	EE804691	TNK2	1.8954	-1.14746	-2.1749
A_70_P069256	EE772675	TNXB	1.81542	-1.21188	-2.20006
A_70_P028096	EE811784	TRAF3IP3	-1.73989	-2.785	-1.60068
A_70_P040576	EE796019	TRIM2	1.20268	2.51827	2.09388
A_70_P048331	EE779877	TRIM34	-2.25512	-1.79643	1.25534
A_70_P040646	EE828924	TRIM45	-1.57639	1.84666	2.91106
A_70_P023172	EE855194	TRPV6	2.20942	1.51827	-1.45522
A_70_P018756	EE793522	TSPAN13	1.46827	2.48402	1.6918
A_70_P051581	DY501792	TYK2	1.11279	2.1109	1.89695
A_70_P059781	EE824441	UBE2E1	-1.17259	1.79555	2.10545
A_70_P055131	EE769363	UPB1	1.14492	2.57303	2.24733
A_70_P053601	FE025224	USP12P1	1.44765	2.26425	1.56409
A_70_P044981	EE868311	VN2R412P	2.08296	-1.03971	-2.16568
A_70_P007251	FE035332	WDR34	-1.0303	-2.00981	-1.95071
A_70_P060016	EE754091	WWTR1	-1.50743	1.61876	2.44017
A_70_P037801	EE770705	XAF1	-2.07147	-1.53092	1.35309
A_70_P070936	EE759405	ZBTB33	2.35511	-1.00245	-2.36088
A_70_P019401	EE784147	ZC3H12C	1.47802	2.19256	1.48344
A_70_P069801	EE793245	ZC3HAV1	-2.01903	-1.14202	1.76795
A_70_P033291	EE836325	ZCCHC2	-2.05512	1.10131	2.26333
A_70_P019946	EE776209	ZMIZ2	2.00769	1.68029	-1.19485
A_70_P019256	EE783299	ZNF263	2.07375	1.63668	-1.26705
